# Supplementary material
Source: PubMed Central journal article supplement (PMC6443499)
Supplement: NIHMS1011246-supplement-Supp_figS1.pdf [file NIHMS1011246-supplement-Supp_figS1.pdf]

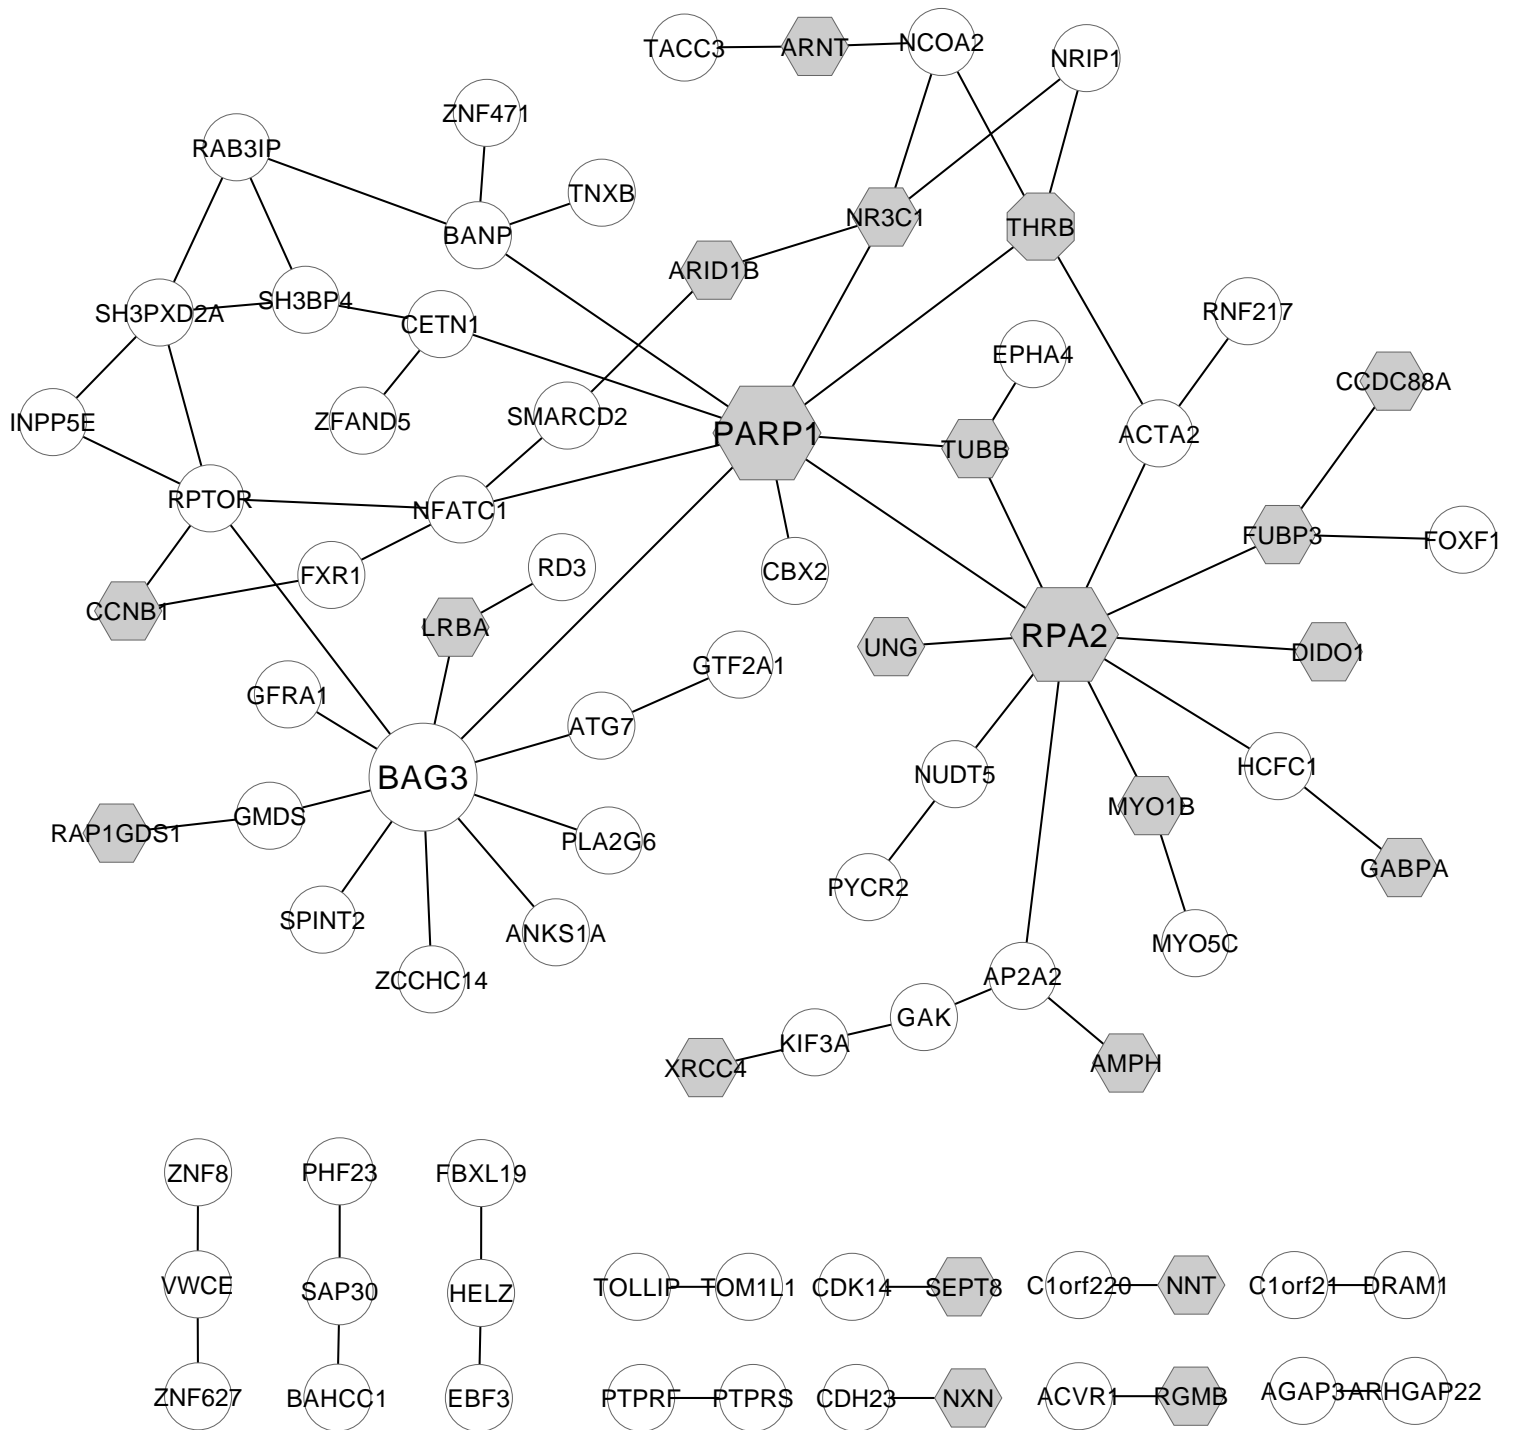

**Figure S1.** Protein-protein interaction networks involving proteins that are represented by Top 300 probes showing strong correlation with the right insular surface area. Shaded boxes represent the proteins that are related to AUD or alcohol response.
