# Supplementary material
Source: PubMed Central journal article supplement (PMC6443499)
Supplement: NIHMS1011246-supplement-Supp_figS2.pdf [file NIHMS1011246-supplement-Supp_figS2.pdf]

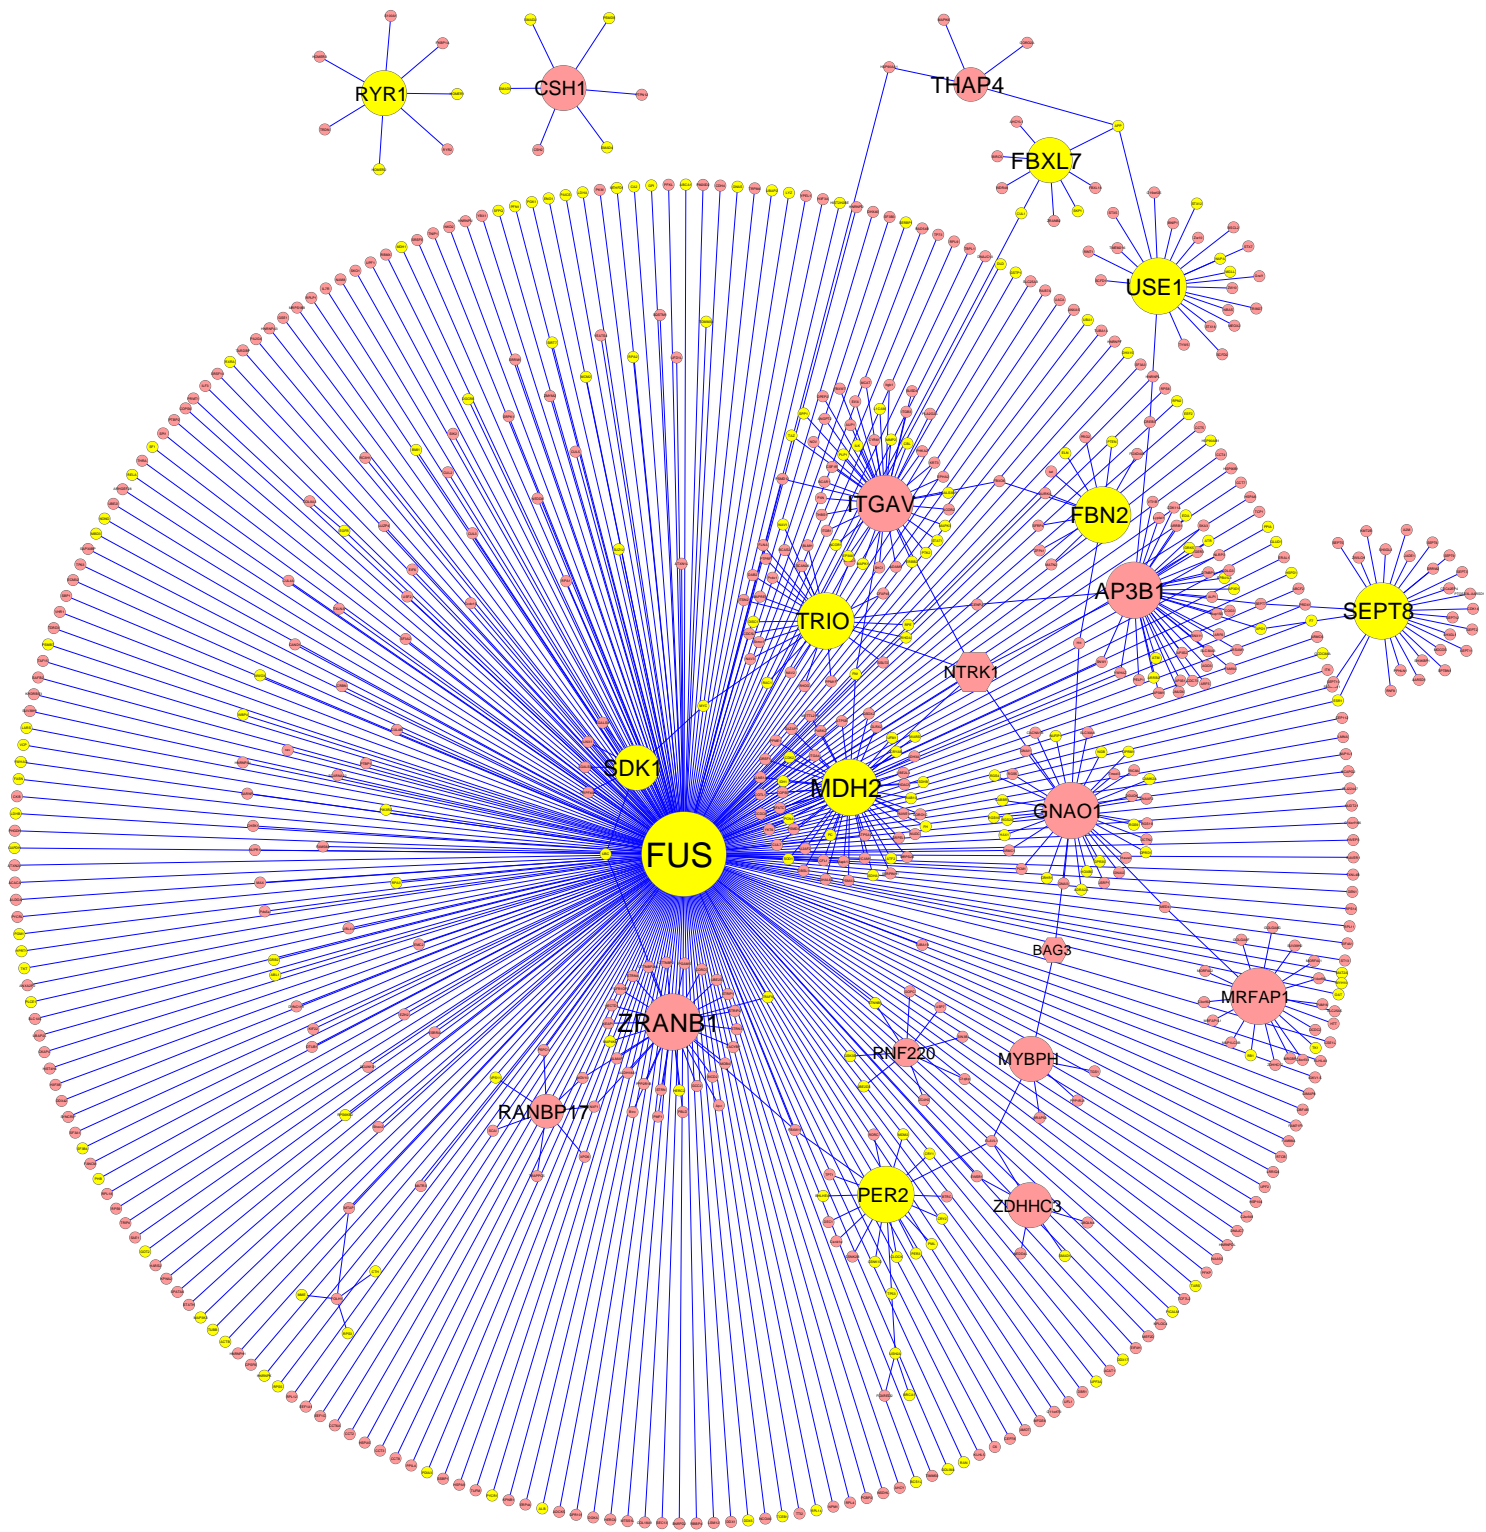

**Figure S2.** Protein-protein interaction networks involving 25 proteins whose DNA methylation levels are correlated with both right insular surface area and AUD. Yellow-coded nodes represent the genes that are related to AUD or alcohol response. Small nodes can be visualized by zooming in.
